# Supplementary material for: A Gestalt perspective on Manichaean worldviews and individuals’ engagement in violence: the case of the Italian far left
Source: Frontiers journal article supplement (doi:10.3389/fpos.2025.1432824), 2025-01-17
Supplement: Data_Sheet_1.docx [file Data_Sheet_1.docx]

**References to publicly-available data examined**

Bertagna, G., Ceretti, A. and Mazzucato, C. (2015) *Il libro dell’incontro. Vittime e responsabili della lotta armata a confronto*. ilSaggiatore.

Bonavita, A. (1990) ‘La Notte della Repubblica. La nascita delle Brigate Rosse’. Available at: https://www.youtube.com/watch?v=N-nWhIFAXLc (Accessed: 1 April 2019).

Bonisoli, F. (2018a) ‘’68 e oltre. Il mondo chiama. Tra ideologia e realtà’. Available at: youtube.com/watch?v=IVw9d5yptFg.

Bonisoli, F. (2018b) ‘Speciale Soul - Meeting Rimini 2018 - Franco Bonisoli Ospite di Monica Mondo’. Available at: youtube.com/watch?v=sb5K5i4p-oQ.

Faranda, A. (2017) ‘Incontri possibili’. Available at: https://www.youtube.com/watch?v=RwTaYZwrJcs&t=1s.

Ferrandi, M. (1990) ‘La Notte della Repubblica. Prima Linea’. Available at: raiplay.it/video/2016/07/La-notte-della-Repubblica-Puntata-del-14031990-0b32a9d0-b838-4fd3-b24a-838005870e.html (Accessed: 6 January 2020).

Ferrandi, M. (2020) ‘Beati Voi - La Genesi’. Available at: https://www.tv2000.it/beaitivoi/video/mario-ferrandi/ (Accessed: 16 June 2020).

Zavoli, S. (2017) *La Notte della Repubblica*. 1st edn. Milano: Mondadori (Oscar Storia).
